# Supplementary material for: VO2nanorods for efficient performance in thermal fluids and sensors
Source: Royal Society of Chemistry journal article supplement (doi:10.1039/c4nr06032f), 2015-01-01
Supplement: c4nr06032f1.pdf [file c4nr06032f1.pdf]

## Supporting Information

### **VO<sub>2</sub> nanorods for efficient performance in thermal fluids and sensors**

**Kajal Kumar Dey,<sup>a,b</sup> Divyanshu Bhatnagar,<sup>a</sup> Avanish Kumar Srivastava,<sup>\*a</sup> Meher Wan,<sup>b</sup>  
Satyendra Singh,<sup>b</sup> Raja Ram Yadav,<sup>b</sup> Bal Chandra Yadav<sup>c</sup> and Melepurath Deepa<sup>d</sup>**

<sup>a</sup> National Physical Laboratory, Dr. K. S. Krishnan Road, New Delhi-110012, India

<sup>b</sup> Department of Physics, University of Allahabad, Allahabad, Uttar Pradesh-211002, India

<sup>c</sup> Department of Applied Physics, School for Physical Sciences, Babasaheb Bhimrao Ambedkar University, Lucknow 226025, U.P., India

<sup>d</sup> Department of Chemistry, Indian Institute of Technology Hyderabad, Yeddumailaram - 502205, Andhra Pradesh, India Address, Town

\*Corresponding author. Tel.: 91-11-45609308; fax: 91-11-45609310.

E-mail address: [aks@nplindia.org](mailto:aks@nplindia.org)

**S1. Plots representing the actual ratio  $K_{nf}/K_{EG}$  ( $K_{nf}$  is the thermal conductivity of the nanofluid and  $K_{EG}$  being thermal conductivity of the base fluid) across the entire experimental temperature range of 20 to 80 °C**

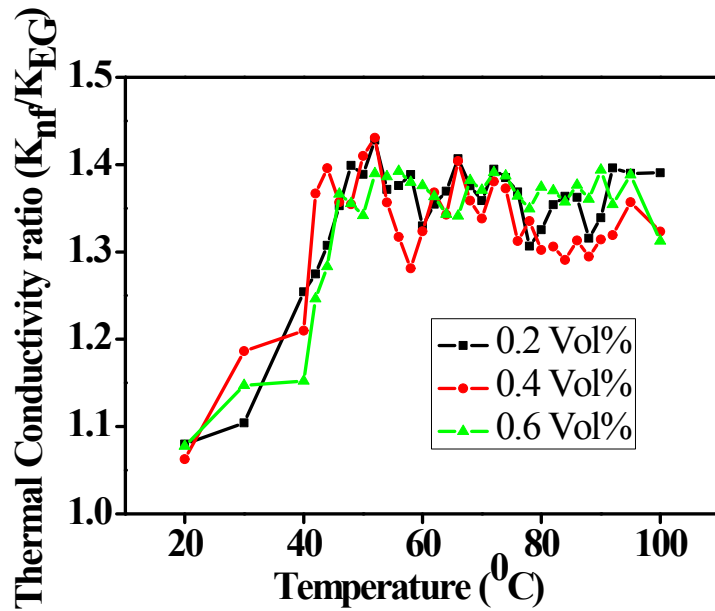

**Fig. S1.** Thermal conductivity ratios for the  $\text{VO}_2$  (B)/EG nanofluids for different volume percent of  $\text{VO}_2$ .  $K_{nf}$  = thermal conductivity of the nanofluid,  $K_{EG}$  = thermal conductivity of ethylene glycol.

**S2. Table representing comparison of VO<sub>2</sub> sensor performance towards different gases**

| Sl. No. | Sensing material | Target gas     | Operating temperature | % sensor response                                         | Response time | Recovery time | Reference number |
|---------|------------------|----------------|-----------------------|-----------------------------------------------------------|---------------|---------------|------------------|
| 1       | VO <sub>2</sub>  | ethanol        | 300 °C                | 8%                                                        | ---           | ---           | [1]              |
| 2       | VO <sub>2</sub>  | hydrogen       | room temperature      | 19%                                                       | 890 s         | 870 s         | [2]              |
| 3       | VO <sub>2</sub>  | carbon dioxide | 170 °C                | 10 %                                                      | --            | --            | [2]              |
| 4       | VO <sub>2</sub>  | LPG            | room temperature      | 21 %                                                      | 100 s         | 100 s         | Present case     |
| 5       | VO <sub>2</sub>  | Humidity       | room temperature      | 0.27 MΩ/%RH (in 10-40 %RH),<br>0.07 MΩ/%RH (in 40-90 %RH) | ---           | ---           | Present case     |

**Table 1** Comparison of VO<sub>2</sub> sensor response towards different gas.

- [1]. G. Micocci, A. Serra, A. Tepore, S. Capone, R. Rella and P. Siciliano, *J. Vac. Sci. Technol. A*, 1997, **15**, 34.
- [2]. A. Simo, B. Mwakikunga, B. T. Sone, B. Julies, R. Madjoe and M. Maaza, *Int. J. Hydrogen Energ.*, 2014, **39**, 8147.
